# Supplementary material for: Removal of Different Dye Solutions: A Comparison Study Using a Polyamide NF Membrane
Source: PubMed Central journal article supplement (PMC7764484; doi:10.3390/membranes10120408), 2020-12-10
Supplement: membranes-10-00408-s001.pdf [file membranes-10-00408-s001.pdf]

## Supporting Information

# Removal of Different Dye Solutions: A Comparison Study Using a Polyamide NF Membrane

Asunción María. Hidalgo <sup>1,\*</sup>, Gerardo León <sup>2</sup>, María Gómez <sup>1</sup>, María Dolores Murcia <sup>1</sup>, Elisa Gómez <sup>1</sup> and José Antonio Macario <sup>1</sup>

<sup>1</sup> Departamento de Ingeniería Química, Facultad de Química, Campus de Espinardo, Universidad de Murcia, 30100 Murcia, Spain; maría.gomez@um.es (M.G.); md.murcia@um.es (M.D.M.); egomez@um.es (E.G.); joseantonio.macario@um.es (J.A.M.)

<sup>2</sup> Departamento de Ingeniería Química y Ambiental, Universidad Politécnica de Cartagena, 30202 Cartagena, Spain; gerardo.leon@upct.es

\* Correspondence: ahidalgo@um.es; Tel.: +34-868-887-353

**Table S1.** Comparison of dye removal between previous studies and this study in terms of water flux and rejection.

| Membrane          | Target Dye     | Experimental conditions  | Water Flux (L/m <sup>2</sup> h bar) | Rejection (%) | Reference           |
|-------------------|----------------|--------------------------|-------------------------------------|---------------|---------------------|
| NF99              | Acid Brown-83  | 50 mg/L dye at 10 bar    | 66.6                                | 99.36         | This work           |
| NF99              | Allura Red     | 50 mg/L dye at 10 bar    | 82.9                                | 99.92         | This work           |
| NF99              | Basic Fuchsin  | 50 mg/L dye at 10 bar    | 79.0                                | 93.66         | This work           |
| NF99              | Crystal Violet | 50 mg/L dye at 10 bar    | 72.9                                | 99.77         | This work           |
| IM26              | Crystal Violet | 100 mg/L dye at 4 bar    | 30.8                                | 88.4          | Cheng et al. 2016   |
| Psf UF            | Crystal Violet | 100 mg/L dye at 0.8 bar  | 38.2                                | 46.8          | Cheng et al. 2016   |
| EGCG-PEI-TC/PTFE  | Crystal Violet | 100 mg/L dye at 2 bar    | 4                                   | 100           | Zhang et al. 2020   |
| Modified Psf (M1) | Crystal Violet | 100 mg/L dye at 4.14 bar | 2.2                                 | 85            | Rambabu et al. 2019 |
| NF99              | Methyl Orange  | 50 mg/L dye at 10 bar    | 78.5                                | 88.49         | This work           |
| EGCG-PEI-TC/PTFE  | Methyl Orange  | 100 mg/L dye at 2 bar    | 5.5                                 | 100           | Zhang et al. 2020   |
| ANF TFC           | Methyl Orange  | 100 mg/L dye at 4 bar    | 8.4                                 | 98.6          | Li et al. 2019      |
| PMIA TFC          | Methyl Orange  | 100 mg/L dye at 4 bar    | 1.2                                 | 100           | Li et al. 2019      |
| NF90              | Methyl Orange  | 100 mg/L dye at 4 bar    | 4                                   | 100           | Li et al. 2019      |
| NF 270            | Methyl Orange  | 100 mg/L dye at 4 bar    | 9.3                                 | 98.6          | Li et al. 2019      |

|                             |               |                       |       |       |                      |
|-----------------------------|---------------|-----------------------|-------|-------|----------------------|
| PS/PEI (20%)                | Methyl Orange | 50 mg/L dye at 4 bar  | 16.30 | 64.7  | Benkhaya et al. 2020 |
| NF99                        | Sunset Yellow | 50 mg/L dye at 10 bar | 86.4  | 99.39 | This work            |
| NF 90                       | Sunset Yellow | 50 mg/L dye at 5 bar  | 14.9  | >99   | Jun et al. 2019      |
| Treat pH 13.5 ,7D           | Sunset Yellow | 50 mg/L dye at 5 bar  | 16.0  | >99   | Jun et al. 2019      |
| DEA-modified PA-TFC         | Sunset Yellow | 100 mg/L dye at 5 bar | 14.8  | 97.5  | Liu et al. 2017      |
| PA-TFC                      | Sunset Yellow | 100 mg/L dye at 5 bar | 9.3   | >99   | Lü et al. 2019       |
| CMCNa/PP composite membrane | Sunset Yellow | 100 mg/L dye at 5 bar | 8.6   | 82.2  | Yu et al. 2012       |
| Sericin-TCM                 | Sunset Yellow | 100 mg/L dye at 5 bar | 12.4  | 95.4  | Zhou et al. 2014     |

## References

- Benkhaya, S.; M'rabet, S.; Hsissou, R.; El Harfi, A. Synthesis of new low-cost organic ultrafiltration membrane made from Polysulfone/Polyetherimide blends and its application from soluble azoic dyes removal. *J. Mater. Res. Technol.* **2020**, *9*, 4763–4772.
- Cheng, L.; Zhu, L.P.; Zhang, P.B.; Sun, J.; Zhu, B.K.; Xu, Y.Y. Molecular separation by poly (N-vinyl imidazole) gel-filled membranes. *J. Membrane Sci.* **2016**, *497*, 472–484.
- Jun, B.M.; Yoon, Y.; Park, C.M. Post-treatment of nanofiltration polyamide membrane through alkali-catalyzed hydrolysis to treat dyes in model wastewater. *Water.* **2019**, *11*, 1645–1659.
- Li, Y.; Wong, E.; Mai, Z.; Der Bruggen, B.V. Fabrication of composite polyamide/Kevlar aramid nanofiber nanofiltration membranes with high permselectivity in water desalination. *J. Membrane Sci.* **2019**, *592*, 117396–117407.
- Liu, M.; Chen, Q.; Lu, K.; Huang, W.; Lü, Z., S.; Zhou, C.; Yu, S.; Gao, C. High efficient removal dyes from aqueous solution through nanofiltration using diethanolamine-modified polyamide thin-film composite membrane. *Sep. Purif. Technol.* **2017**, *137*, 135–143.
- Lü, Z.; Hu, F.; Li, H.; Zhang, X.; Yu, S.; Liu, M. Gao, C. Composite nanofiltration membrane with asymmetric selective separation layer for enhanced separation efficiency to anionic dye aqueous solution. *J. Hazard. Mater.* **2019**, *368*, 436–443.
- Rambabu, K.; Bharath, G.; Monash, P.; Velu, S., Banat, F.; Naushad, M.; Arthanareeswaran, G.; Show, P.L. Effective treatment of dye pollutant wastewater using nanoporous CaCl<sub>2</sub> modified polyethersulfone membrane. *Process Safety Environ. Protection*, **2019**, *124*, 266–278.
- Yu, S.; Chen, Z.; Cheng, Q.; Lü, Z.; Liu, M. Gao, C. Application of thin-film composite hollow fiber membrane to submerged nanofiltration of anionic dye aqueous solutions. *Sep. Purif. Technol.* **2012**, *88*, 121–129.
- Zhang, N.; Huang, Z.; Yang, N.; Zhang, L.; Jiang, B.; Sun, Y.; Ma, J. Nanofiltration membrane via EGCG-PEI co-deposition followed by crosslinking on microporous PTFE substrates for desalination. *Sep. Purif. Technol.* **2020**, *232*, 115964–115974.

Zhou, C.; Shi, Y.; Sun, C.; Yu, S.; Liu, M; Gao, C. Thin-film composite membranes formed by interfacial polymerization with natural material sericin and trimesoyl chloride for nanofiltration. *J. Membrane Sci.* **2014**, *471*, 381-391.

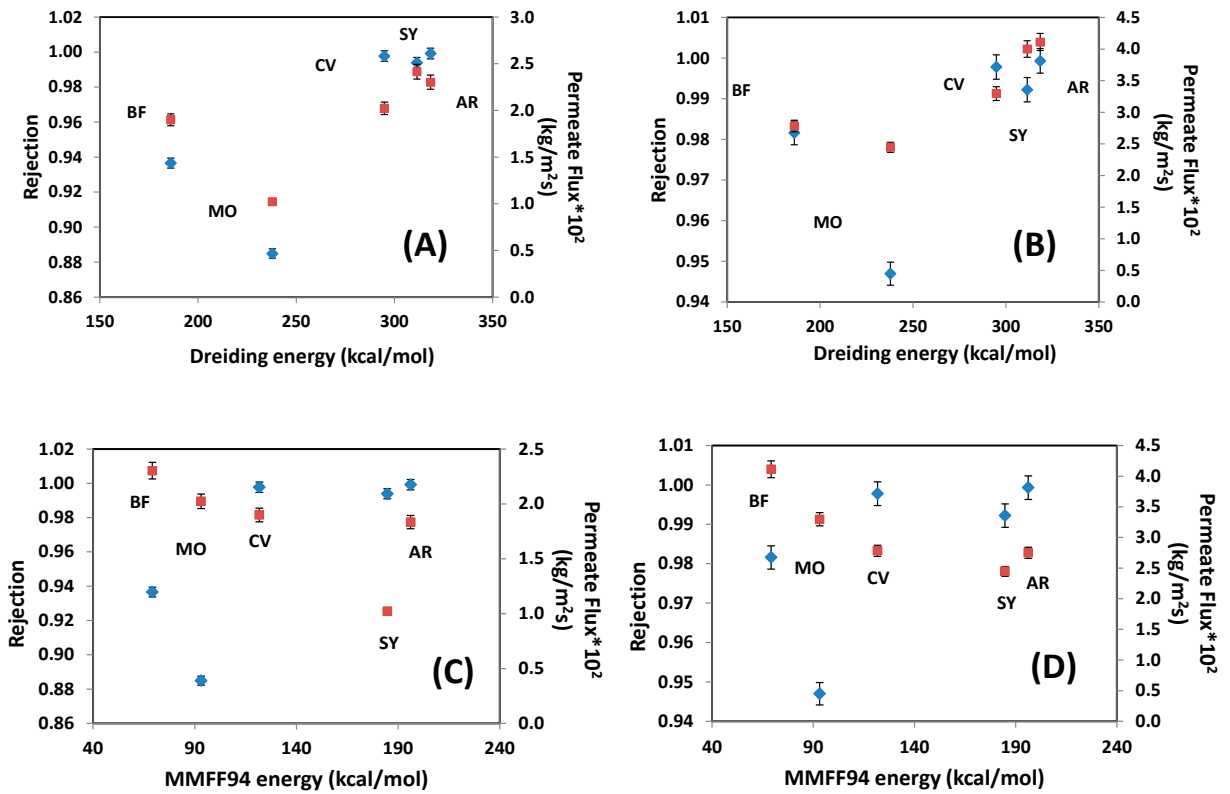

**Figure S1.** Rejection coefficient ( $\blacklozenge$ ) and permeate flux ( $\blacksquare$ ) variation with dreiding energy (A&B) and with MMFF94 Energy (C&D) for colorants: (MO) Methyl Orange, (BF) Basic Fuchsin, (SY) Sunset Yellow, (AR) Allure Red, (CV) Crystal Violet. Experimental conditions: pH =7, [Dyes] = 50 mg/L and pressure 10 bar (A&C) and 15 bar (B&D).

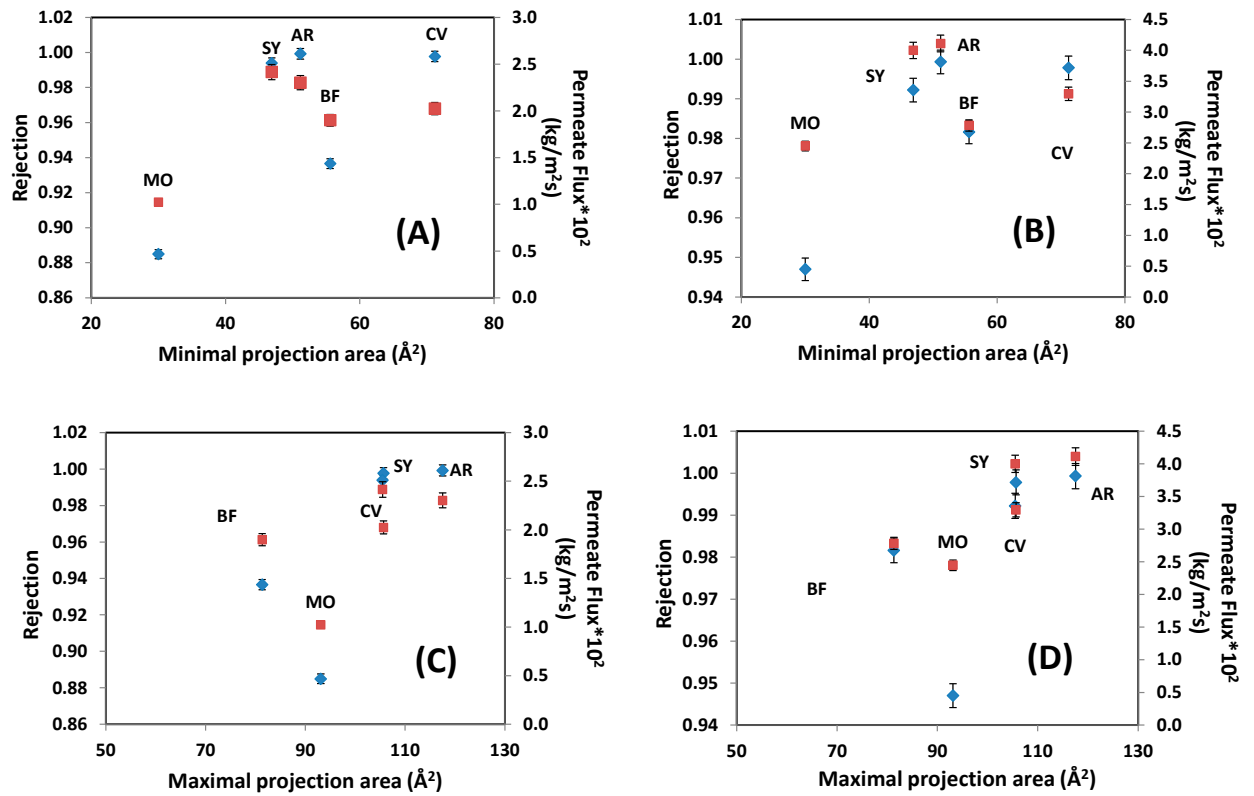

**Figure S2.** Rejection coefficient (◆) and permeate flux (■) variation with minimal projection area (A&B) and with maximal projection area (C&D) for colorants: (MO) Methyl Orange, (BF) Basic Fuchsin, (SY) Sunset Yellow, (AR) Allure Red, (CV) Crystal Violet. Experimental conditions: pH =7, [Dyes] = 50 mg/L and pressure 10 bar (A&C) and 15 bar (B&D).

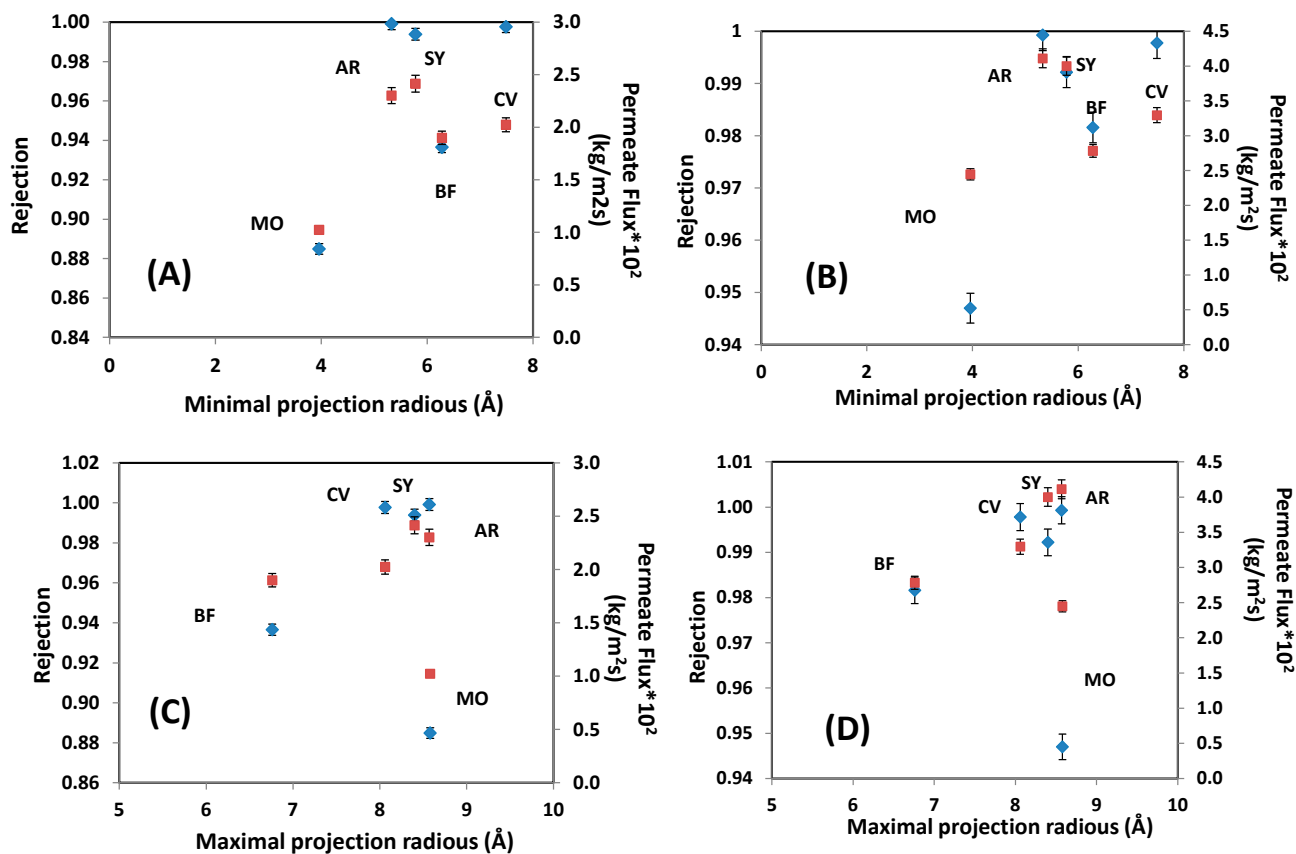

**Figure S3.** Rejection coefficient (◆) and permeate flux (■) variation with minimal projection radius (A&B) and with maximal projection radius (C&D) for colorants: (MO) Methyl Orange, (BF) Basic Fuchsin, (SY) Sunset Yellow, (AR) Allure Red, (CV) Crystal Violet. Experimental conditions: pH =7, [Dyes] = 50 mg/L and pressure 10 bar (A&C) and 15 bar (B&D).

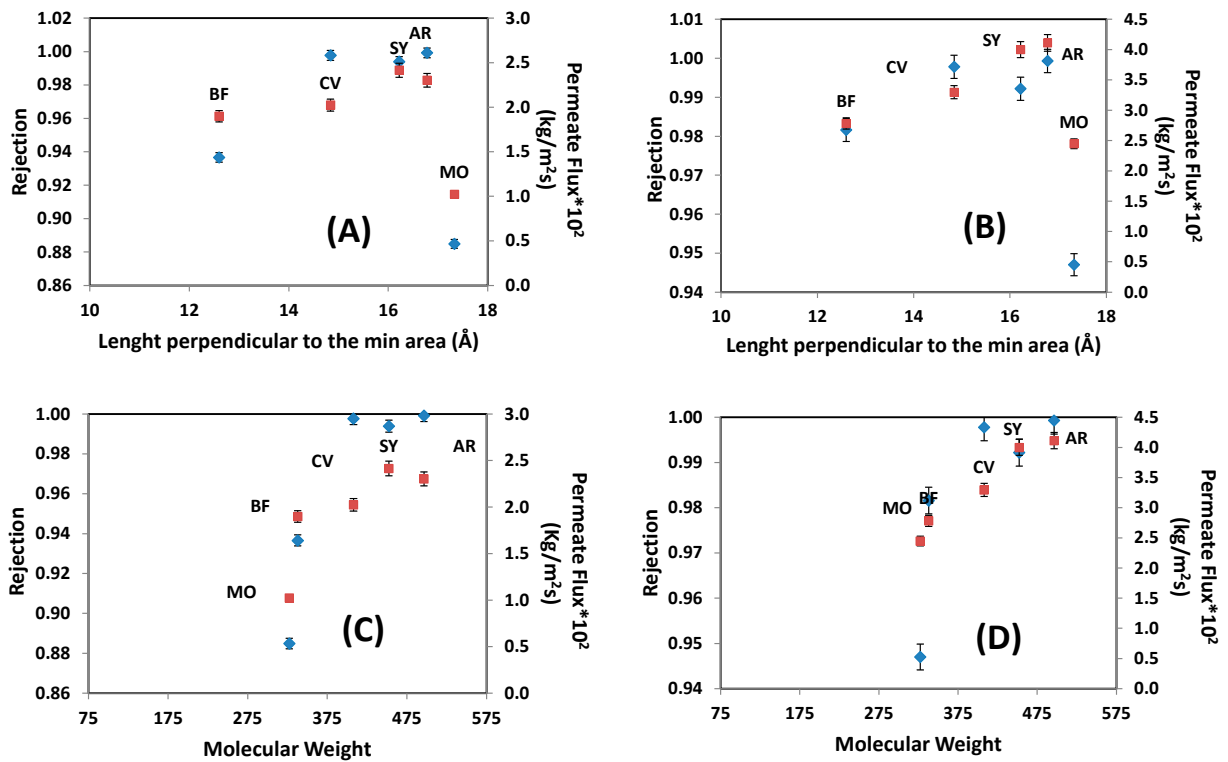

**Figure S4.** Rejection coefficient ( $\blacklozenge$ ) and permeate flux ( $\blacksquare$ ) variation with length perpendicular to the minimal area (A&B) and with molecular weight (C&D) for colorants: (MO) Methyl Orange, (BF) Basic Fuchsin, (SY) Sunset Yellow, (AR) Allure Red, (CV) Crystal Violet. Experimental conditions: pH =7, [Dyes] = 50 mg/L and pressure 10 bar (A&C) and 15 bar (B&D).
